# Supplementary material for: Genome-Wide Chromatin Immunoprecipitation Sequencing Analysis of the Penicillium chrysogenum Velvet Protein PcVelA Identifies Methyltransferase PcLlmA as a Novel Downstream Regulator of Fungal Development
Source: PubMed Central journal article supplement (PMC4999599; doi:10.1128/msphere.00149-16), 2016-07-13
Supplement: sph004162112st8.pdf [file sph004162112st8.pdf]

**Table S1: *P. chrysogenum* strains used in this work**

| Strain                   | Characteristics and genotype                                                                                        | Source     |
|--------------------------|---------------------------------------------------------------------------------------------------------------------|------------|
| P2niaD18                 | <i>niaD</i> <sup>-</sup>                                                                                            | (1)        |
| ΔPcku70 <sup>b</sup>     | <i>Pcku70Δ::FRT; niaD</i> <sup>-</sup>                                                                              | (2)        |
| ΔPcvelA <sup>b</sup>     | <i>Pcku70Δ::FRT; PcvelAΔ::FRT; niaD</i> <sup>-</sup>                                                                | (3)        |
| PcVelA-ChIP (T16.2)      | <i>Pcku70Δ::FRT; PcvelAΔ::FRT; P<sub>gpd</sub>::PcvelA::EGFP::T<sub>trpC</sub>; PtrpC::nat1; niaD</i> <sup>-</sup>  | This study |
| ΔPcllMAFRT1 <sup>a</sup> | <i>Pcku70Δ::FRT; PcllMAΔ::FRT::Pxyl::Pcflp::PtrpC::nat1::FRT; niaD</i> <sup>-</sup>                                 | This study |
| ΔPcllMAFRT2 <sup>b</sup> | <i>Pcku70Δ::FRT; PcllMAΔ::FRT; niaD</i> <sup>-</sup>                                                                | This study |
| P2niaD18::PcllMA         | <i>Pgpd::PcllMA::T<sub>trpC</sub>; PtrpC::nat1; niaD</i> <sup>-</sup>                                               | This study |
| ΔPcllMAFRT2::PcllMA      | <i>Pcku70Δ::FRT; PcllMAΔ::FRT; PPcllMA::PcllMA::T<sub>PcllMA</sub>; PtrpC::nat1; niaD</i> <sup>-</sup>              | This study |
| ΔPcvelAΔPcllMAFRT1       | <i>Pcku70Δ::FRT; PcvelAΔ::FRT; PcllMAΔ::FRT::Pxyl::Pcflp::PtrpC::nat1::FRT; niaD</i> <sup>-</sup>                   | This study |
| BiFC-N/N                 | <i>Pgpd::eyfpC::T<sub>trpC</sub>; Pgpd::eyfpN::T<sub>trpC</sub>; PtrpC::nat1; niaD</i> <sup>-</sup>                 | This study |
| BiFC-N/PcLlMA            | <i>Pgpd::eyfpC::T<sub>trpC</sub>; Pgpd::PcllMA::eyfpC::T<sub>trpC</sub>; PtrpC::nat1; niaD</i> <sup>-</sup>         | This study |
| BiFC-PcVelA/N            | <i>Pgpd::PcvelA::eyfpN::T<sub>trpC</sub>; Pgpd::eyfpN::T<sub>trpC</sub>; PtrpC::nat1; niaD</i> <sup>-</sup>         | This study |
| BiFC-PcVelA/PcLlMA       | <i>Pgpd::PcvelA::eyfpN::T<sub>trpC</sub>; Pgpd::PcllMA::eyfpC::T<sub>trpC</sub>; PtrpC::nat1; niaD</i> <sup>-</sup> | This study |

<sup>a</sup> strains that still carry a resistance marker from the flipper knockout construct

<sup>b</sup> strains without any resistance markers due to FLP/FRT marker recycling.

1. **Hoff B, Pöggeler S, Kück U.** 2008. Eighty years after its discovery, Fleming's *Penicillium* strain discloses the secret of its sex. *Eukaryot Cell* **7**:465-470.
2. **Kopke K, Hoff B, Kück U.** 2010. Application of the *Saccharomyces cerevisiae* FLP/FRT recombination system in filamentous fungi for marker recycling and construction of knockout strains devoid of heterologous genes. *Appl Environ Microbiol* **76**:4664-4674.
3. **Kopke K, Hoff B, Bloemendal S, Katschorowski A, Kamerewerd J, Kück U.** 2013. Members of the *Penicillium chrysogenum* velvet complex play functionally opposing roles in the regulation of penicillin biosynthesis and conidiation. *Eukaryot Cell* **12**:299-310.
