# Supplementary material for: Genome-Wide Chromatin Immunoprecipitation Sequencing Analysis of the Penicillium chrysogenum Velvet Protein PcVelA Identifies Methyltransferase PcLlmA as a Novel Downstream Regulator of Fungal Development
Source: PubMed Central journal article supplement (PMC4999599; doi:10.1128/msphere.00149-16), 2016-07-13
Supplement: sph004162112st9.pdf [file sph004162112st9.pdf]

**Table S2: Plasmids used in this work**

| Name         | Characteristics                                                                                                                                                                                                                                                                                                                                                                                    | Source     |
|--------------|----------------------------------------------------------------------------------------------------------------------------------------------------------------------------------------------------------------------------------------------------------------------------------------------------------------------------------------------------------------------------------------------------|------------|
| pPcVelA-EGFP | $P_{gpd}$ of <i>A. nidulans</i> , <i>egfp</i> , <i>PcvelA</i> gene of <i>P. chrysogenum</i> , $T_{trpC}$ of <i>A. nidulans</i> , $P_{trpC}$ of <i>A. nidulans</i> , <i>nat</i> resistance gene of <i>Streptomyces noursei</i> ; used for construction of <i>P. chrysogenum</i> ChIP-strains via ectopic integration into strain $\Delta$ PcVelA                                                    | This study |
| pEYFPC-nat   | <i>gpd</i> promoter of <i>A. nidulans</i> , <i>eyfp<sub>C</sub></i> -fragment (aa 155-238), <i>trpC</i> terminator of <i>A. nidulans</i> , $P_{trpC}$ of <i>A. nidulans</i> , <i>nat</i> resistance gene of <i>Streptomyces noursei</i>                                                                                                                                                            | (1)        |
| pEYFPN-nat   | <i>gpd</i> promoter of <i>A. nidulans</i> , <i>eyfp<sub>N</sub></i> -fragment (aa 1-154), <i>trpC</i> terminator of <i>A. nidulans</i> , $P_{trpC}$ of <i>A. nidulans</i> , <i>nat</i> resistance gene of <i>Streptomyces noursei</i>                                                                                                                                                              | (1)        |
| pYNVELA      | <i>PcvelA</i> ORF in <i>NotI</i> site of pEYFPN-nat                                                                                                                                                                                                                                                                                                                                                | (1)        |
| pYCLLMA      | <i>PcllMA</i> ORF in <i>NcoI</i> and <i>NotI</i> site of pEYFPC-nat                                                                                                                                                                                                                                                                                                                                | (1)        |
| pGADT7       | <i>ADH1(p)::gal4 AD::LEU2</i>                                                                                                                                                                                                                                                                                                                                                                      | Clontech   |
| pGBKT7       | <i>ADH1(p)::gal4 BD::TRP1</i>                                                                                                                                                                                                                                                                                                                                                                      | Clontech   |
| pAD-PcvelA   | <i>PcvelA</i> cDNA in <i>SmaI</i> and <i>SacI</i> site in pGADT7                                                                                                                                                                                                                                                                                                                                   | (2)        |
| pAD-PcllMA   | <i>PcllMA</i> cDNA in <i>EcoRI</i> and <i>BamHI</i> site in pGADT7                                                                                                                                                                                                                                                                                                                                 | This study |
| pAD-PclaeA   | <i>PclaeA</i> cDNA in <i>EcoRI</i> and <i>XhoI</i> site in pGADT7                                                                                                                                                                                                                                                                                                                                  | (2)        |
| pBD-PcvelA   | <i>PcvelA</i> cDNA in <i>SmaI</i> and <i>SacI</i> site in pGBKT7                                                                                                                                                                                                                                                                                                                                   | (2)        |
| pBD-PcllMA   | <i>PcllMA</i> cDNA in <i>EcoRI</i> and <i>BamHI</i> site in pGADT7                                                                                                                                                                                                                                                                                                                                 | This study |
| pBD-PclaeA   | <i>PclaeA</i> cDNA in <i>EcoRI</i> and <i>PstI</i> site in pGBKT7                                                                                                                                                                                                                                                                                                                                  | (2)        |
| pKO_PcllMA   | 5' flanking region of <i>PcllMA</i> from <i>P. chrysogenum</i> , <i>Pxyl</i> of <i>P. chrysogenum</i> , <i>flp</i> gene of <i>S. cerevisiae</i> (codon optimized for <i>P. chrysogenum</i> ), $P_{trpC}$ of <i>A. nidulans</i> , <i>nat</i> resistance gene of <i>Streptomyces noursei</i> , <i>FRT</i> sites for marker recycling, 3' flanking region of <i>PcllMA</i> from <i>P. chrysogenum</i> | This study |
| pKL4         | 5' flanking region of <i>PcllMA</i> from <i>P. chrysogenum</i> , <i>PcllMA</i> of <i>P. chrysogenum</i> , $P_{trpC}$ of <i>A. nidulans</i> , <i>nat</i> resistance gene of <i>Streptomyces noursei</i> , 3' flanking region of <i>PcllMA</i> from <i>P. chrysogenum</i>                                                                                                                            | This study |
| pKL3         | $P_{gpd}$ of <i>A. nidulans</i> , <i>PcllMA</i> of <i>P. chrysogenum</i> , $P_{trpC}$ of <i>A. nidulans</i> , <i>nat</i> resistance gene of <i>Streptomyces noursei</i>                                                                                                                                                                                                                            | This study |

1. **Hoff B, Kamerewerd J, Sigl C, Mitterbauer R, Zadra I, Kürnsteiner H, Kück U.** 2010. Two components of a velvet-like complex control hyphal morphogenesis, conidiophore development, and penicillin biosynthesis in *Penicillium chrysogenum*. *Eukaryot Cell* **9**:1236-1250.
2. **Kopke K, Hoff B, Bloemendal S, Katschorowski A, Kamerewerd J, Kück U.** 2013. Members of the *Penicillium chrysogenum* velvet complex play functionally opposing roles in the regulation of penicillin biosynthesis and conidiation. *Eukaryot Cell* **12**:299-310.
